# Supplementary material for: Enantiomeric cannabidiol derivatives: synthesis and binding to cannabinoid receptors
Source: Royal Society of Chemistry journal article supplement (doi:10.1039/b416943c), 2005-01-01
Supplement: b416943c.pdf [file b416943c.pdf]

**Table S1. Binding of (-)- and (+)-CBD and their derivatives to the central (CB<sub>1</sub>) and peripheral (CB<sub>2</sub>) cannabinoid receptors.**

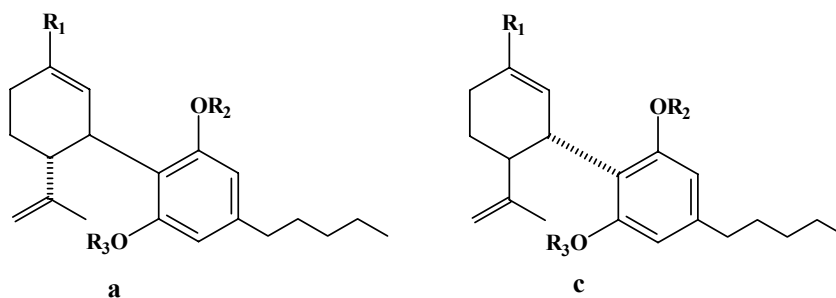

| compound | R <sub>1</sub>     | R <sub>2</sub>  | R <sub>3</sub>  | CB <sub>1</sub> (K <sub>i</sub> , nM) | CB <sub>2</sub> (K <sub>i</sub> , nM) |
|----------|--------------------|-----------------|-----------------|---------------------------------------|---------------------------------------|
| 4a       | CH <sub>3</sub>    | H               | H               | > 10000                               | > 10000                               |
| 4c       | CH <sub>3</sub>    | H               | H               | 842 ± 36                              | 203 ± 16                              |
| 5a       | CH <sub>3</sub>    | CH <sub>3</sub> | CH <sub>3</sub> | > 10000                               | > 10000                               |
| 5c       | CH <sub>3</sub>    | CH <sub>3</sub> | CH <sub>3</sub> | > 10000                               | > 10000                               |
| 12a      | CH <sub>2</sub> OH | H               | H               | > 10000                               | > 10000                               |
| 12c      | CH <sub>2</sub> OH | H               | H               | 5.3 ± 0.5                             | 101.0 ± 5.1                           |
| 18a      | COOH               | H               | H               | > 10000                               | > 10000                               |
| 18c      | COOH               | H               | H               | 13.2 ± 0.4                            | 321.8 ± 15.8                          |

**Table S2. Binding of (-)- and (+)-CBD-DMH and their derivatives to the central (CB<sub>1</sub>) and peripheral (CB<sub>2</sub>) cannabinoid receptors.**

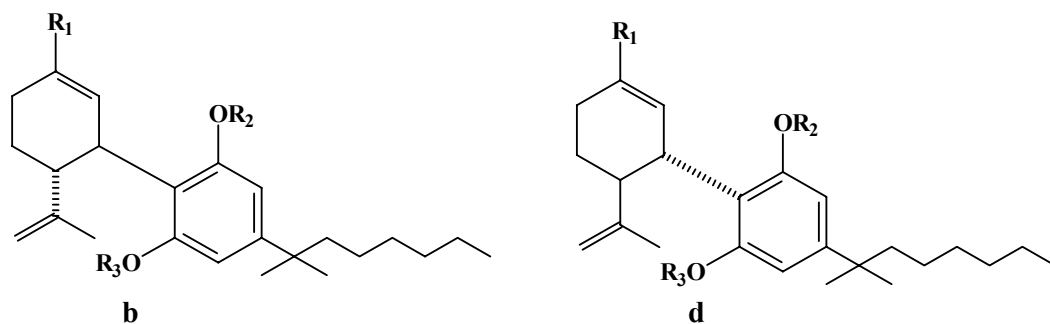

| compound | R <sub>1</sub>     | R <sub>2</sub>  | R <sub>3</sub>  | K <sub>i</sub> (nM)/CB <sub>1</sub> | K <sub>i</sub> (nM)/CB <sub>2</sub> |
|----------|--------------------|-----------------|-----------------|-------------------------------------|-------------------------------------|
| 4b       | CH <sub>3</sub>    | H               | H               | > 10000                             | 1800                                |
| 4d       | CH <sub>3</sub>    | H               | H               | 17.4 ± 1.8                          | 211 ± 23                            |
| 5b       | CH <sub>3</sub>    | CH <sub>3</sub> | CH <sub>3</sub> | > 10000                             | > 10000                             |
| 5d       | CH <sub>3</sub>    | CH <sub>3</sub> | CH <sub>3</sub> | > 10000                             | < 10000                             |
| 12b      | CH <sub>2</sub> OH | H               | H               | 4400                                | 671 ± 12                            |
| 12d      | CH <sub>2</sub> OH | H               | H               | 2.50 ± 0.03                         | 44.0 ± 3.1                          |
| 18b      | COOH               | H               | H               | > 1000                              | < 10000                             |
| 18d      | COOH               | H               | H               | 5.8 ± 0.7                           | 155.5 ± 5.3                         |
